# Supplementary material
Source: PubMed Central journal article supplement (PMC11010617)

**Capacity for the management of kidney failure in the International Society of Nephrology Oceania and South East Asia (OSEA) region: Report from the 2023 ISN Global Kidney Health Atlas (ISN-GKHA)**

**Supplementary Tables and Figures**

**Table S1.** Burden of CKD in the ISN OSEA region.

**Table S2.** Funding for KRT in the ISN OSEA region.

**Table S3.** Workforce and KRT centers per million population (pmp) for medical kidney care in the ISN OSEA region.

**Figure S1.** Funding for non-dialysis CKD (left) care and (right) medications in the ISN OSEA region.

**Figure S2.** Funding for dialysis (left) and transplant (right) medications in the ISN OSEA region.

**Figure S3.** Workforce shortages for medical kidney care in the ISN OSEA region.

**Table S1.** Burden of CKD in the ISN OSEA region.<sup>27</sup>

| Country/Territory                 | CKD Prevalence<br>% (95% CI) | Death attributed to<br>CKD<br>% (95% CI) | DALYS attributed to<br>CKD<br>% (95% CI) |
|-----------------------------------|------------------------------|------------------------------------------|------------------------------------------|
| <b>Global (median [IQR])</b>      | 9.5 (5.9-11.7)               | 2.4 (1.6-3.9)                            | 1.6 (1.5-1.8)                            |
| <b>OSEA region (median [IQR])</b> | 10.4 (9.1-10.3)              | 3.4 (2.7-4.2)                            | 2.4 (1.97-2.96)                          |
| <b>Australia</b>                  | 10.83 (10.17 - 11.51)        | 3.05 (2.53 - 3.44)                       | 1.38 (1.2 - 1.56)                        |
| <b>Brunei Darussalam</b>          | 8.42 (7.73 - 9.12)           | 4.16 (3.88 - 4.45)                       | 2.44 (2.16 - 2.73)                       |
| <b>Cambodia</b>                   | 8.20 (7.58 - 8.88)           | 1.98 (1.77 - 2.18)                       | 1.55 (1.38 - 1.73)                       |
| <b>Fiji</b>                       | 10.73 (9.91 - 11.54)         | 3.94 (3.61 - 4.3)                        | 3.1 (2.79 - 3.39)                        |
| <b>Indonesia</b>                  | 10.34 (9.54 - 11.18)         | 2.47 (2.35 - 2.6)                        | 2.12 (1.93 - 2.32)                       |
| <b>Lao PDR</b>                    | 8.55 (7.89 - 9.25)           | 3.85 (3.36 - 4.54)                       | 2.54 (2.21 - 2.96)                       |
| <b>Malaysia</b>                   | 10.54 (9.79 - 11.31)         | 3.47 (3.12 - 3.82)                       | 2.5 (2.2 - 2.79)                         |
| <b>Myanmar</b>                    | 10.12 (9.35 - 10.93)         | 2.74 (2.55 - 3.03)                       | 2.25 (2.06 - 2.46)                       |
| <b>New Caledonia</b>              | -                            | -                                        | -                                        |
| <b>New Zealand</b>                | 11.08 (10.28 - 11.87)        | 2.65 (2.31 - 2.91)                       | 1.48 (1.29 - 1.65)                       |
| <b>Philippines</b>                | 9.54 (8.83 - 10.23)          | 5.22 (4.97 - 5.59)                       | 3.52 (3.14 - 3.9)                        |
| <b>Samoa</b>                      | 9.08 (8.41 - 9.78)           | 4.49 (3.93 - 5.15)                       | 3.4 (2.93 - 3.88)                        |
| <b>Singapore</b>                  | 13.86 (12.87 - 14.84)        | 3.26 (2.84 - 3.56)                       | 1.93 (1.7 - 2.16)                        |
| <b>Thailand</b>                   | 16.67 (15.51 - 17.85)        | 5.51 (4.9 - 6.01)                        | 3.5 (3.05 - 3.95)                        |
| <b>Vietnam</b>                    | 10.74 (9.89 - 11.59)         | 3.4 (2.79 - 3.81)                        | 2.36 (1.99 - 2.68)                       |

Abbreviations: ISN, International Society of Nephrology; OSEA, Oceania and South East Asia; CKD, chronic kidney disease; DALYs, disability-adjusted life years, CI, confidence interval; IQR, interquartile range  
‘ - ’ : data not reported/unavailable

**Table S2.** Funding for KRT in the ISN OSEA region.

| Country/Territory        | Publicly funded (free) |    |    |    | Publicly funded (some fees) |    |    |    | Mixed |    |    |    | Solely private (out-of-pocket) |    |    |    | Solely private (health insurance) |    |    |    | Multiple systems |    |    |    | N/A |    |    |    |
|--------------------------|------------------------|----|----|----|-----------------------------|----|----|----|-------|----|----|----|--------------------------------|----|----|----|-----------------------------------|----|----|----|------------------|----|----|----|-----|----|----|----|
|                          | AKI                    | HD | PD | TX | AKI                         | HD | PD | TX | AKI   | HD | PD | TX | AKI                            | HD | PD | TX | AKI                               | HD | PD | TX | AKI              | HD | PD | TX | AKI | HD | PD | TX |
| <b>American Samoa</b>    |                        |    |    |    |                             |    |    |    |       |    |    |    |                                |    |    |    |                                   |    |    |    |                  |    |    |    |     |    |    |    |
| <b>Australia</b>         | X                      | X  |    | X  |                             |    |    |    |       |    | X  |    |                                |    |    |    |                                   |    |    |    |                  |    |    |    |     |    |    |    |
| <b>Brunei Darussalam</b> | X                      | X  | X  | X  |                             |    |    |    |       |    |    |    |                                |    |    |    |                                   |    |    |    |                  |    |    |    |     |    |    |    |
| <b>Cambodia</b>          |                        |    |    |    |                             |    |    |    |       |    |    |    |                                |    | X  | X  |                                   |    |    |    | X                | X  |    |    |     |    |    |    |
| <b>Fiji</b>              |                        |    |    |    |                             |    |    |    |       |    |    |    |                                |    | X  |    |                                   |    |    | X  | X                | X  |    |    |     |    |    |    |
| <b>Indonesia</b>         | X                      |    |    |    |                             | X  | X  | X  |       |    |    |    |                                |    |    |    |                                   |    |    |    |                  |    |    |    |     |    |    |    |
| <b>Lao PDR</b>           |                        |    |    |    | X                           | X  |    |    |       |    |    |    |                                |    |    |    |                                   |    |    |    |                  |    |    |    |     | X  | X  |    |
| <b>Malaysia</b>          |                        |    |    |    |                             |    |    |    | X     | X  | X  | X  |                                |    |    |    |                                   |    |    |    |                  |    |    |    |     |    |    |    |
| <b>Myanmar</b>           | X                      |    |    |    |                             |    |    |    |       | X  |    | X  |                                |    | X  |    |                                   |    |    |    |                  |    |    |    |     |    |    |    |
| <b>New Caledonia</b>     |                        |    |    |    |                             |    |    |    | X     | X  | X  | X  |                                |    |    |    |                                   |    |    |    |                  |    |    |    |     |    |    |    |
| <b>New Zealand</b>       | X                      | X  | X  | X  |                             |    |    |    |       |    |    |    |                                |    |    |    |                                   |    |    |    |                  |    |    |    |     |    |    |    |
| <b>Papua New Guinea</b>  |                        |    |    |    |                             |    |    |    |       |    |    |    |                                | X  | X  | X  | X                                 |    |    |    |                  |    |    |    |     |    |    |    |
| <b>Philippines</b>       |                        |    |    |    | X                           | X  | X  |    |       |    |    |    |                                |    |    |    |                                   |    |    |    |                  |    |    |    |     | X  |    |    |
| <b>Samoa</b>             |                        |    |    |    |                             | X  |    |    | X     |    |    |    |                                |    |    |    |                                   |    |    |    |                  |    |    |    |     | X  | X  |    |
| <b>Singapore</b>         |                        |    |    |    |                             |    |    |    | X     |    |    | X  |                                |    |    |    |                                   |    |    |    | X                | X  |    |    |     |    |    |    |
| <b>Solomon Islands</b>   |                        |    |    |    |                             |    |    |    |       |    |    |    |                                |    |    |    |                                   |    |    |    |                  |    |    |    | X   | X  | X  | X  |
| <b>Thailand</b>          |                        |    |    |    | X                           | X  | X  | X  |       |    |    |    |                                |    |    |    |                                   |    |    |    |                  |    |    |    |     |    |    |    |
| <b>Vanuatu</b>           |                        |    |    |    |                             |    |    |    |       |    |    |    |                                | X  | X  | X  | X                                 |    |    |    |                  |    |    |    |     |    |    |    |
| <b>Vietnam</b>           |                        |    |    |    | X                           | X  | X  | X  |       |    |    |    |                                |    |    |    |                                   |    |    |    |                  |    |    |    |     |    |    |    |

X: Yes

Abbreviations: KRT, kidney replacement therapy; ISN, International Society of Nephrology; OSEA, Oceania and South East Asia; AKI, acute kidney injury; HD, hemodialysis; PD, peritoneal dialysis; TX, transplant medications; PDR, People’s Democratic Republic

**Table S3.** Workforce and KRT centers per million population (pmp) for medical kidney care in the ISN OSEA region.

| Country/ Territory                | Dialysis & Transplant Centers (pmp 2023*) |                |                  | Nephrology Workforce (pmp) |                 |                         |                |                |
|-----------------------------------|-------------------------------------------|----------------|------------------|----------------------------|-----------------|-------------------------|----------------|----------------|
|                                   | HD                                        | PD             | Tx               | Nephrologists              |                 | Pediatric Nephrologists | Trainees       |                |
|                                   |                                           |                |                  | 2019*                      | 2023*           | 2023*                   | 2019*          | 2023*          |
| <b>Global (median [IQR])</b>      | 5.1 [1.6-11.1]                            | 1.6 [0.45-3.1] | 0.46[0.23-0.75]  | 10.0 [1.2-22.7]            | 11.8 [1.8-24.8] | 0.69                    | 1.4 [0.35-3.7] | 1.2 [0.18-3.8] |
| <b>OSEA region (median [IQR])</b> | 5.5 [1.7-13.2]                            | 1.5 [0.45-3.2] | 0.34 [0.17-0.59] | 5.7 [1.1-16.6]             | 3.2 [0.61-12.9] | 0.13                    | 1.1 [0.3-4.5]  | 0.96 [0.2-3.9] |
| <b>American Samoa</b>             | -                                         | -              | -                | -                          | -               | -                       | -              | -              |
| <b>Australia</b>                  | 3.56                                      | 2.33           | 0.57             | 21.3                       | 23.11           | -                       | 5.2            | 5.74           |
| <b>Brunei Darussalam</b>          | 14.64                                     | 4.18           | 2.09             | 28.85                      | 12.55           | -                       | 11.1           | 6.28           |
| <b>Cambodia</b>                   | 0.9                                       | -              | -                | 0.91                       | 1.02            | -                       | 0.3            | 0.3            |
| <b>Fiji</b>                       | 8.48                                      | 1.06           | -                | 1.08                       | 3.18            | -                       | 1.08           | 1.06           |
| <b>Indonesia</b>                  | 3.75                                      | 0.14           | 0.03             | 0.49                       | 0.8             | -                       | 0.23           | 0.2            |
| <b>Lao PDR</b>                    | 2.45                                      | -              | -                | -                          | 1.03            | -                       | 11.34          | 1.03           |
| <b>Malaysia</b>                   | 27.16                                     | 1.48           | 0.18             | 5.66                       | 5.9             | -                       | 1.1            | 0.89           |
| <b>Myanmar</b>                    | 0.7                                       | 0.02           | 0.12             | 0.49                       | 0.61            | -                       | 0.31           | 0.26           |
| <b>New Caledonia</b>              | 40.38                                     | 3.37           | 3.37             | 40.67                      | 33.65           | -                       | 0              | 6.73           |
| <b>New Zealand</b>                | 3.17                                      | 3.17           | 0.59             | 15.4                       | 12.86           | -                       | 4.51           | 3.96           |
| <b>Papua New Guinea</b>           | 0.21                                      | -              | -                | -                          | -               | -                       | -              | -              |
| <b>Philippines</b>                | 7.31                                      | 0.45           | 0.28             | -                          | -               | -                       | -              | -              |
| <b>Samoa</b>                      | 9.7                                       | -              | -                | -                          | -               | -                       | -              | -              |
| <b>Singapore</b>                  | 13.51                                     | 1.35           | 0.34             | -                          | -               | -                       | -              | -              |
| <b>Solomon Islands</b>            | -                                         | -              | -                | -                          | -               | -                       | -              | -              |
| <b>Thailand</b>                   | 12.92                                     | 1.72           | 0.43             | -                          | -               | -                       | -              | -              |
| <b>Vanuatu</b>                    | -                                         | 3.25           | -                | -                          | -               | -                       | -              | -              |
| <b>Vietnam</b>                    | 0.96                                      | 0.29           | 0.17             | -                          | -               | -                       | -              | -              |

Abbreviations: KRT, kidney replacement therapy; ISN, International Society of Nephrology; OSEA, Oceania and South East Asia; HD, hemodialysis; PD, peritoneal dialysis; Tx, kidney transplant; PDR, People's Democratic Republic; IQR, interquartile range.

\*ISN-GKHA report year

**Figure S1.** Funding for non-dialysis CKD (left) care and (right) medications in the ISN OSEA region.\*

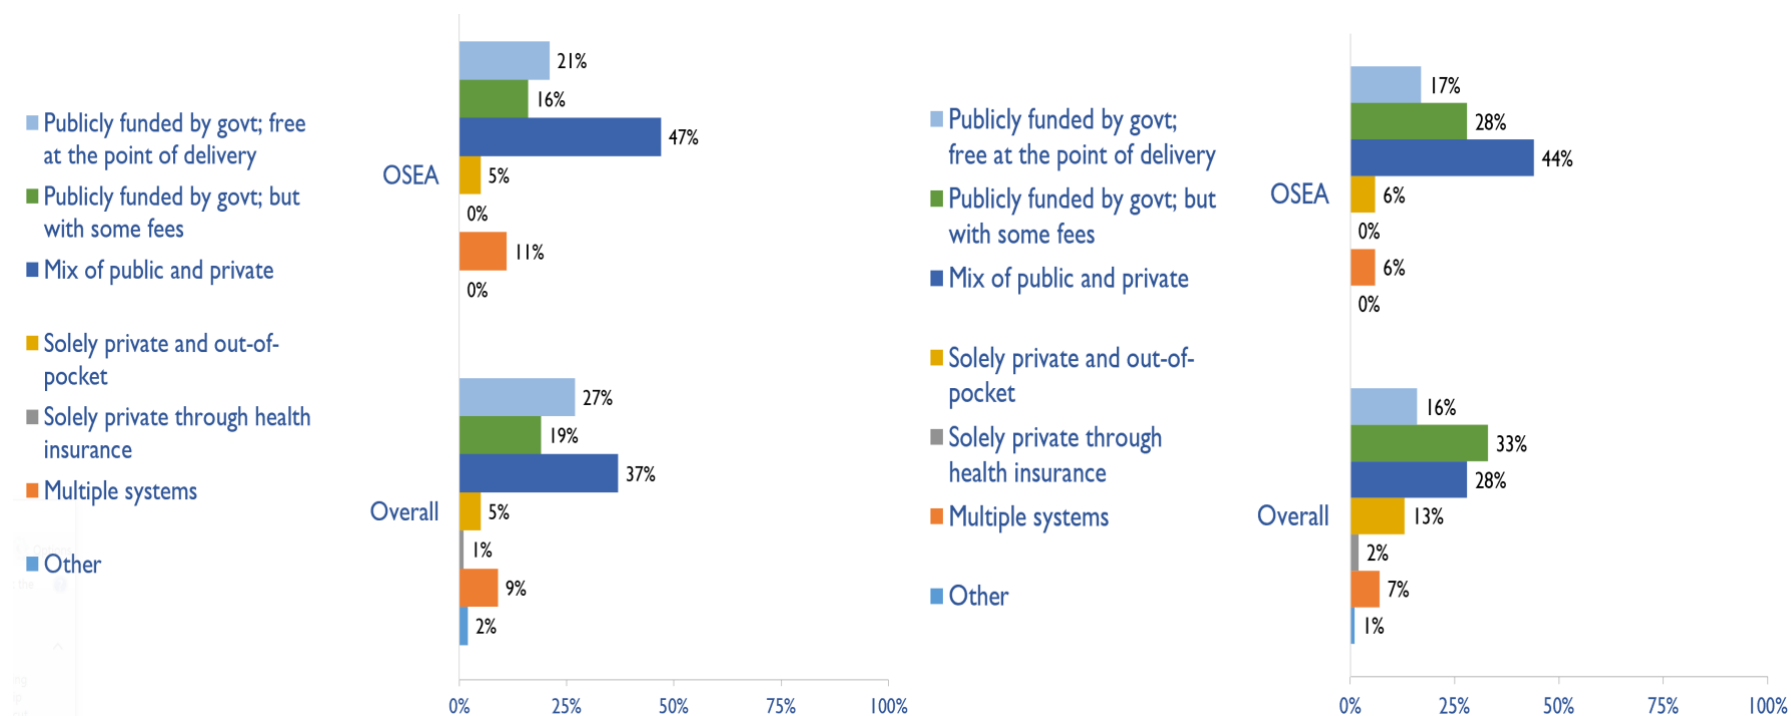

\*Values represent absolute number of countries in each category expressed as a percentage of total number of countries.

Abbreviations: CKD, chronic kidney disease; ISN, International Society of Nephrology; OSEA, Oceania and South East Asia; gov't, government

**Supplementary Figure S2.** Funding for dialysis (left) and transplant (right) medications in the ISN OSEA region.\*

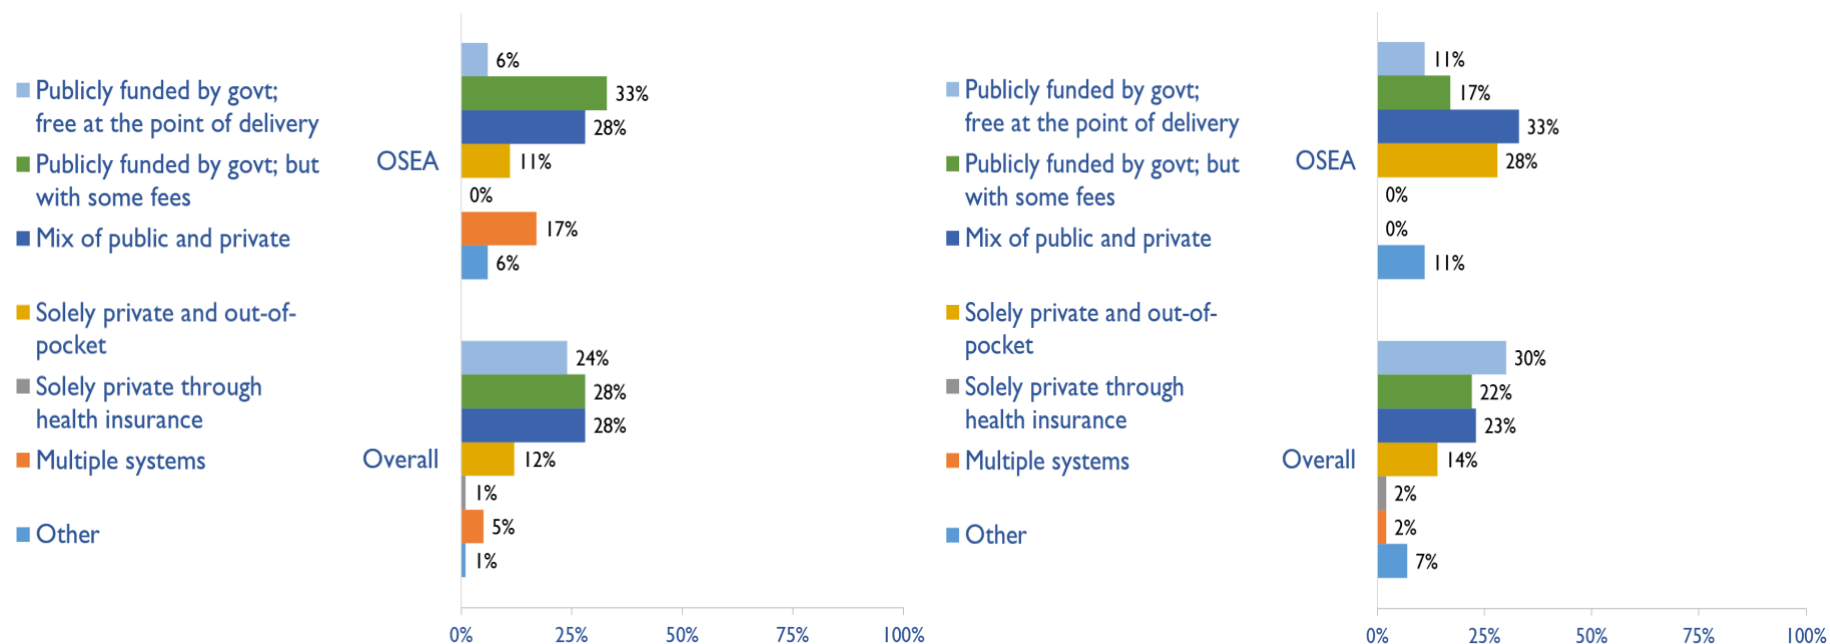

\*Values represent absolute number of countries in each category expressed as a percentage of total number of countries.

Abbreviations: ISN, International Society of Nephrology; OSEA, Oceania and South East Asia; gov't, government

**Figure S3.** Workforce shortages for medical kidney care in the ISN OSEA region.

| Country/Territory | Nephrologists | Pediatric nephrologists | Transplant surgeons | Surgeons (HD access) | Surgeons (PD access) | Dietitians  | Laboratory technicians | Radiologists (ultrasound) | Vascular access coordinators | Counsellors/psychologists | Transplant coordinators | Dialysis nurses | Renal nurses | Dialysis technicians | Social workers | Palliative care physicians | Kidney supportive care nurses |
|-------------------|---------------|-------------------------|---------------------|----------------------|----------------------|-------------|------------------------|---------------------------|------------------------------|---------------------------|-------------------------|-----------------|--------------|----------------------|----------------|----------------------------|-------------------------------|
| Australia         | Shortage      | Shortage                | Shortage            | Shortage             | Shortage             | Shortage    | Shortage               | Shortage                  | Shortage                     | Shortage                  | Shortage                | Shortage        | Shortage     | Shortage             | Shortage       | Shortage                   | Shortage                      |
| Brunei Darussalam | Shortage      | Shortage                | Shortage            | Shortage             | Shortage             | Shortage    | Shortage               | Shortage                  | Shortage                     | Shortage                  | Shortage                | Shortage        | Shortage     | Shortage             | Shortage       | Shortage                   | Shortage                      |
| Cambodia          | No Shortage   | No Shortage             | No Shortage         | No Shortage          | No Shortage          | Shortage    | Shortage               | Shortage                  | No Shortage                  | No Shortage               | No Shortage             | No Shortage     | No Shortage  | No Shortage          | No Shortage    | No Shortage                | No Shortage                   |
| Fiji              | No Shortage   | No Shortage             | No Shortage         | Shortage             | Shortage             | No Shortage | Shortage               | Shortage                  | Shortage                     | Shortage                  | Shortage                | Shortage        | Shortage     | Shortage             | Shortage       | Shortage                   | Shortage                      |
| Indonesia         | No Shortage   | No Shortage             | No Shortage         | No Shortage          | No Shortage          | No Shortage | No Shortage            | No Shortage               | No Shortage                  | No Shortage               | No Shortage             | No Shortage     | No Shortage  | No Shortage          | No Shortage    | No Shortage                | No Shortage                   |
| Lao PDR           | No Shortage   | No Shortage             | No Shortage         | No Shortage          | No Shortage          | No Shortage | No Shortage            | No Shortage               | No Shortage                  | No Shortage               | No Shortage             | No Shortage     | No Shortage  | No Shortage          | No Shortage    | No Shortage                | No Shortage                   |
| Malaysia          | No Shortage   | No Shortage             | No Shortage         | No Shortage          | No Shortage          | No Shortage | No Shortage            | No Shortage               | No Shortage                  | No Shortage               | No Shortage             | No Shortage     | No Shortage  | No Shortage          | No Shortage    | No Shortage                | No Shortage                   |
| Myanmar           | Shortage      | No Shortage             | No Shortage         | Shortage             | Shortage             | Shortage    | Shortage               | Shortage                  | Shortage                     | Shortage                  | Shortage                | Shortage        | Shortage     | Shortage             | Shortage       | Shortage                   | Shortage                      |
| New Caledonia     | No Shortage   | No Shortage             | No Shortage         | No Shortage          | No Shortage          | No Shortage | Shortage               | Shortage                  | No Shortage                  | No Shortage               | No Shortage             | No Shortage     | No Shortage  | No Shortage          | No Shortage    | No Shortage                | No Shortage                   |
| New Zealand       | Shortage      | Shortage                | Shortage            | Shortage             | Shortage             | Shortage    | Shortage               | Shortage                  | Shortage                     | Shortage                  | Shortage                | Shortage        | Shortage     | Shortage             | Shortage       | Shortage                   | Shortage                      |
| Philippines       | No Shortage   | No Shortage             | Shortage            | Shortage             | Shortage             | No Shortage | Shortage               | Shortage                  | Shortage                     | Shortage                  | Shortage                | Shortage        | Shortage     | Shortage             | Shortage       | Shortage                   | Shortage                      |
| Samoa             | No Shortage   | No Shortage             | No Shortage         | No Shortage          | No Shortage          | No Shortage | No Shortage            | No Shortage               | No Shortage                  | No Shortage               | No Shortage             | No Shortage     | No Shortage  | No Shortage          | No Shortage    | No Shortage                | No Shortage                   |
| Singapore         | No Shortage   | No Shortage             | No Shortage         | No Shortage          | No Shortage          | No Shortage | No Shortage            | No Shortage               | No Shortage                  | No Shortage               | No Shortage             | No Shortage     | No Shortage  | No Shortage          | No Shortage    | No Shortage                | No Shortage                   |
| Thailand          | No Shortage   | No Shortage             | No Shortage         | No Shortage          | No Shortage          | No Shortage | No Shortage            | No Shortage               | No Shortage                  | No Shortage               | No Shortage             | No Shortage     | No Shortage  | No Shortage          | No Shortage    | No Shortage                | No Shortage                   |
| Vietnam           | No Shortage   | No Shortage             | No Shortage         | Shortage             | Shortage             | Shortage    | Shortage               | Shortage                  | Shortage                     | Shortage                  | Shortage                | Shortage        | Shortage     | Shortage             | Shortage       | Shortage                   | Shortage                      |

Abbreviations: ISN, International Society of Nephrology; OSEA, Oceania and South East Asia; HD, hemodialysis; PD, peritoneal dialysis; PDR, People’s Democratic Republic

**Legend:**

No Shortage

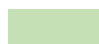

Shortage

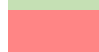

Supplement: mmc1.pdf [file mmc1.pdf]
